# Supplementary material
Source: HighWire-hosted journal article supplement (https://www.annfammed.org/highwire/filestream/8902/field_highwire_adjunct_files/0/Cuellar_Supp_Table.pdf)
Supplement: Cuellar_Supp_Table.pdf [file Cuellar_Supp_Table.pdf]

**Supplemental materials for:**

Cuellar A, Krist AH, Nichols LM, Kuzel AJ. Effect of practice ownership on work environment, learning culture, psychological safety, and burnout. *Ann Fam Med*. 2018;16(Suppl 1):44-51.

Supplemental Table: Association of Practice Ownership on Work Environment, Learning Culture, Psychological Safety and Burnout, All Survey Respondents

|                                   | (1)                              | (2)                          | (3)                                | (4)                               | (5)                  |
|-----------------------------------|----------------------------------|------------------------------|------------------------------------|-----------------------------------|----------------------|
|                                   | Culture of Learning <sup>a</sup> | Most Enjoy Work <sup>a</sup> | Place of Hope and Joy <sup>a</sup> | Psychological Safety <sup>a</sup> | Burnout <sup>b</sup> |
| Ownership                         |                                  |                              |                                    |                                   |                      |
| Independent                       | Reference                        | Reference                    | Reference                          | Reference                         | Reference            |
| Hospital owned                    | -0.020                           | 0.064*                       | 0.047                              | 0.092**                           | -0.248*              |
|                                   | [-0.075,0.035]                   | [0.006,0.121]                | [-0.008,0.013]                     | [0.036,0.147]                     | [-0.444,-0.051]      |
| Federally qualified health center | 0.026                            | -0.034                       | -0.038                             | -0.059                            | -0.027               |
|                                   | [-0.049,0.101]                   | [-0.109,0.040]               | [-0.114,0.038]                     | [-0.126,0.008]                    | [-0.308,0.255]       |
| Medically underserved area        | -0.010                           | 0.061                        | 0.025                              | -0.116                            | 0.200*               |
|                                   | [-0.164,0.145]                   | [-0.146,0.269]               | [-0.177,0.227]                     | [-0.305,0.073]                    | [0.021,0.379]        |
| Practice Size                     |                                  |                              |                                    |                                   |                      |
| 1-5 clinicians                    | Reference                        | Reference                    | Reference                          | Reference                         | Reference            |
| 6-10 clinicians                   | -0.145                           | -0.162                       | -0.125                             | -0.135                            | 0.012                |
|                                   | [-0.317,0.027]                   | [-0.373,0.048]               | [-0.335,0.085]                     | [-0.321,0.052]                    | [-0.165,0.189]       |
| 11 or more clinicians             | -0.168                           | -0.120                       | -0.209                             | -0.181                            | 0.052                |
|                                   | [-0.392,0.057]                   | [-0.417,0.176]               | [-0.487,0.069]                     | [-0.476,0.114]                    | [0.199,0.303]        |
| Multi-specialty practice          | Reference                        | Reference                    | Reference                          | Reference                         | Reference            |
| Single specialty practice         | 0.092                            | 0.088                        | 0.122                              | 0.007                             | -0.034               |
|                                   | [-0.079,0.262]                   | [-0.134,0.310]               | [-0.080,0.324]                     | [-0.218,0.233]                    | [-0.243,0.175]       |

|                                          |                 |                 |                 |                 |                 |
|------------------------------------------|-----------------|-----------------|-----------------|-----------------|-----------------|
| % of patients with Medicare              | -0.006**        | -0.008**        | -0.007**        | -0.009**        | 0.004           |
|                                          | [-0.009,-0.002] | [-0.013,-0.003] | [-0.011,-0.002] | [-0.014,-0.003] | [-0.000,0.008]  |
| % of patients with Medicaid or uninsured | 0.000           | 0.002           | 0.003           | 0.000           | -0.002          |
|                                          | [-0.003,0.004]  | [-0.003,0.007]  | [-0.001,0.008]  | [-0.004,0.004]  | [-0.006,0.002]  |
| Intercept Cut 1 <sub>a,b</sub>           | -1.453***       | -1.976***       | -1.969***       | -2.065***       | -0.484**        |
|                                          | [-1.770,-1.136] | [-2.342,-1.609] | [-2.389,-1.549] | [-2.383,-1.748] | [-0.848,-0.119] |
| Intercept Cut 2 <sub>a,b</sub>           | -0.535***       | -1.152***       | -1.168***       | -1.283***       | 0.770***        |
|                                          | [-0.803,-0.266] | [-1.494,-0.811] | [-1.524,-0.813] | [-1.588,-0.978] | [-0.401,1.138]  |
| Intercept Cut 3 <sub>a,b</sub>           | 0.170           | -0.408*         | -0.159          | -0.490**        | -1.460***       |
|                                          | [-0.102,0.443]  | [-0.765,-0.051] | [-0.517,0.200]  | [-0.797,-0.183] | [1.081,1.839]   |
| Intercept Cut 4 <sub>a,b</sub>           | 1.272***        | 1.066***        | 1.101***        | 0.829***        | 1.936***        |
|                                          | [0.973,1.572]   | [0.693,1.440]   | [0.720,1.482]   | [0.518,1.140]   | [1.532,2.340]   |
| N                                        | 1989            | 1988            | 1988            | 1992            | 1984            |

Multivariate ordered probit models adjusted for practice-level nonresponse and clustering at the practice level and controlling for ownership (independent, hospital system, or federally qualified health center), whether practice is located in a medically underserved area, practice size, single or multi-specialty practice, percent of patients with Medicare coverage, and percent of patients with Medicaid coverage or uninsured.

\* $P < 0.05$ .

\*\* $P < 0.01$ .

\*\*\* $P < 0.001$ .
